# Supplementary material
Source: PubMed Central journal article supplement (PMC3294877)
Supplement: supp_56.3.1434_TableS1-S8_REV.pdf [file supp_56.3.1434_TableS1-S8_REV.pdf]

**Table S1.** Primers and probes used in the qPCR assays

| Gene Target   | Primer and probe sequences                                                                               | Amplicon 5' to 3' (bp) | Source or reference                      |
|---------------|----------------------------------------------------------------------------------------------------------|------------------------|------------------------------------------|
| 16S rRNA      | TCCTACGGGAGGCAGCAGT<br>GGACTACCAGGGTATCTAATCCTGTT<br>FAM-CGTATTACCGCGGCTGCTGGCAC-BHQ-1                   | 466                    | Nadkarni et al. (2002)                   |
| IS1133        | GCAGCGTCGGGTTGGA<br>ACGCGTTCGAACAACCTGTAATG<br>VIC-TTTGATGCGCCAGAATA-MGB                                 | 58                     | This study                               |
| <i>str(A)</i> | TCAATCCCCGACTTCTTACCG<br>CACCATGGCAAACAACCATA<br>JOE-TGCTCGACCAAGAGCGGC-BHQ-1                            | 126                    | This study                               |
| <i>str(B)</i> | ATCGCTTTGCAGCTTTGTTT<br>ATGATGCAGATCGCCATGTA<br>CY3-ATGCCTCGGAACCTGCGT-BHQ-2                             | 143                    | This study                               |
| <i>aad(A)</i> | CAGCGCAATGACATTCTTGC<br>GTCGGCAGCGACA(C/T)CCTTCG<br>JOE-TGGTAGGTCCAGCGGCGGAG-BHQ-1                       | 295                    | van Overbeek et al. (2002)<br>This study |
| <i>tet(B)</i> | CGCGGCATCGGTCATT<br>GAACCACTTCACGCGTTGAGA<br>NED-CCGATACCACCTCAGC-MGB                                    | 54                     | This study                               |
| <i>tet(M)</i> | GGTTTCTCTTGGATACTTAAATCAATCR<br>CCAACCATAYAAATCCTTGTTTCRC<br>JOE-ATGCAGTTATGGARGGGATACGCT<br>ATGGY-BHQ-1 | 67                     | Peak et al. (2007)                       |
| <i>tet(W)</i> | CGGCAGCGCAAAGAGAAC<br>CGGGTCAGTATCCGCAAGTT<br>NED-CTGGACGCTCTTACG-MGB                                    | 58                     | This study                               |

1. **Nadkarni, M.A., F.E. Martin, N.A. Jacques, and N. Hunter.** 2002. Determination of bacterial load by real-time PCR using a broad-range (universal) probe and primers set. *Microbiology* **148**:257-266.
2. **Peak, N., C.W. Knapp, R.K. Yang, M.M. Hanfelt, M.S. Smith, D.S. Aga, and D.W. Graham.** 2007. Abundance of six tetracycline resistance genes in wastewater lagoons at cattle feedlots with different antibiotic use strategies. *Environ. Microbiol.* **9**:143-151.
3. **van Overbeek L.S., E.M.H. Wellington, S. Egan, K. Smalla, H. Heuer, J.-M. Collard, G. Guillaume, A.D. Karagouni, T.L. Nikolakopoulou, and J.D. van Elsas.** 2002. Prevalence of streptomycin-resistance genes in bacterial populations in European habitats. *FEMS Microbiol. Ecol.* **42**:277-288.

**Table S2.** Primers used to amplify tetracycline resistance genes in PCR experiments

| Gene           | Primer sequence (5'→3') |                      | T <sub>a</sub><br>(°C) | Fragment<br>size (bp) |
|----------------|-------------------------|----------------------|------------------------|-----------------------|
|                | Forward                 | Reverse              |                        |                       |
| <i>tet(A)</i>  | CGATCTGGTTCACCTCGAA     | CCACGTTGTTATAGAAGCC  | 51                     | 1000                  |
| <i>tet(B)</i>  | QTCGACAAAAGATCGCAT      | CCCTGTAAAGCACCTTGC   | 51                     | 1000                  |
| <i>tet(C)</i>  | TCCATTCCGACAGCATCG      | AACCCGTTCCATGTGCTC   | 57                     | 1000                  |
| <i>tet(D)</i>  | ATAAACCCGCTGTCATCG      | ACACCCGTAGTTTTCC     | 51                     | 1000                  |
| <i>tet(E)</i>  | GGAAAGGCTAATGTTGCAG     | ATCCATTCCACGTTTCGC   | 57                     | 1000                  |
| <i>tet(G)</i>  | AGGTCGCTGGACACTATG      | ACAATCCAAACCAACCG    | 57                     | 1000                  |
| <i>tet(H)</i>  | TATACTGCTGATCACCGT      | CACCAGAGTACCTTGTA    | 51                     | 1000                  |
| <i>tet(J)</i>  | TGAGCGAAAACAGACTCG      | CCATCCCAATATTCAACG   | 51                     | 1000                  |
| <i>tet(M)</i>  | CAAAACAGAAGGTAGAAGT     | TTGTTACAACCATAGCG    | 51                     | 1000                  |
| <i>tet(O)</i>  | GTCAGGGAAACCGTTTAA      | TACGATAGGGGAAAGCAG   | 51                     | 1000                  |
| <i>tet(AP)</i> | ACAGGAGTGGGATTTATT      | CAATACCTCCAACCTCTAT  | 51                     | 1000                  |
| <i>tet(BP)</i> | GGTGGAATAGAACCTGAT      | ATACCATAGGTGTCACAT   | 50                     | 1000                  |
| <i>tet(Q)</i>  | CAAGATGTCTGTTTATGC      | GAATCCCTTCAAAAACGG   | 58                     | 1000                  |
| <i>tet(S)</i>  | AAGGACAACTTTCTGACG      | CCTTCATAACTGCATTT    | 51                     | 1007                  |
| <i>tet(T)</i>  | AATTGTGAAGGTAGGT~AGG    | TCTTAACCCTTCCTTGTGTC | 55                     | 1000                  |
| <i>tet(W)</i>  | GGAGGAAAATACCGACATA     | AATCTTACAGTCCGTTACG  | 51                     | 1000                  |
| <i>tet(X)</i>  | GACCGAGAGGCAAGAATT      | GAAACGTAAAGTCGGGTT   | 53                     | 1000                  |
| <i>tet(Y)</i>  | ACCGGCAGAGCAAACAGC      | AACCAACCATCCCACTG    | 57                     | 1000                  |
| <i>tet(Z)</i>  | TACCTTCTCGACCAGGT       | ATTGTCGGGTGAGTGC     | 71                     | 1000                  |
| <i>tet(30)</i> | GGACATCTTGGTCGAGGTGA    | GGTGAAAAGAACACTGCGG  | 51                     | 1000                  |
| <i>tet(32)</i> | AACCGAAGCATACCGCTC      | CTCTTTCATAGCCACGCC   | 60                     | 1000                  |
| <i>tet(34)</i> | TTCATTATCACTTGGGACGC    | GCTTGCATTAAATTGGTTCC | 65                     | 445                   |
| <i>tet(36)</i> | ATCCGTTGAAGGCAAGGA      | ACCCGATTCACAGGCTTT   | 60                     | 1000                  |

a, T<sub>a</sub>- annealing temperature.

**Table S3.** Primers used to amplify erythromycin resistance genes in PCR experiments

| Gene          | Primer sequence (5'→3')       |                                | T <sub>a</sub><br>(°C) | Fragment<br>size (bp) |
|---------------|-------------------------------|--------------------------------|------------------------|-----------------------|
|               | Forward                       | Reverse                        |                        |                       |
| <i>erm(A)</i> | GAAAAACCCTAAAGACACGCAAAA      | AGTGACATTTGCATGCTTCAAAG        | 58                     | 658                   |
| <i>erm(B)</i> | AAAAATATAAAATATTCTCA          | TAGACAATACTTGCTCATAAGTAAC      | 49                     | 694                   |
| <i>erm(C)</i> | TATTAATAAATTTATAG CTATTGAAAA  | TGAACATGATAATATCTTTGAAAT       | 50                     | 644                   |
| <i>erm(D)</i> | GCTTTGACAACCTGTGCTAAGTCAAAA   | GGCCATTGTGATGCATTACATA         | 58                     | 662                   |
| <i>erm(E)</i> | GCAGCACCCCAACCAGAA            | GGTACTTGCGCAGAAGCGA            | 58                     | 662                   |
| <i>erm(F)</i> | TCGTTTTACGGGTCAGCACTT         | AACTTCCAGCATTTCCAAAAACA        | 55                     | 751                   |
| <i>erm(G)</i> | TCACATAGAAAAATAATGAATTGCATAAG | CGATACAAATTGTTTCGAAACTAATATTGT | 55                     | 652                   |
| <i>erm(Q)</i> | AAGTTATTGGGTTACAGCTA          | CACCTCCTAATTTAAATCTACTA        | 54                     | 623                   |
| <i>erm(V)</i> | CGCCGGACAGCTCGC               | TCCCCACCAGGACGTC               | 60                     | 669                   |
| <i>erm(X)</i> | CGTCACGAGCATGGCCA             | CGAGCGCAACCATGATTATGT          | 58                     | 671                   |
| <i>msr(A)</i> | GCAACGTATTAACGGAGTGC          | GTCTTGATGATATTCTCCGCAGG        | 53                     | 628                   |
| <i>msr(B)</i> | GAGTGCATGGAATTCAGGC           | CGAACTAACGGAAGAACAGG           | 52                     | 956                   |
| <i>srm(B)</i> | CCTGGTTATTCTCAGCAACG          | ACCTTCGATCACTCTCGGTT           | 52                     | 826                   |
| <i>vga</i>    | GTAGGCCGTAATGGAGCTGG          | CGTCTACTTTAGCCATGCC            | 55                     | 841                   |
| <i>ole(B)</i> | GCGAACAGCACACCATCCAC          | GCCTCTTCGAGGCTTCCAC            | 56                     | 912                   |

**Table S4.** Primers used to amplify streptomycin resistance genes in PCR experiments

| Gene           | Primer sequence (5'→3') |                      | T <sub>aa</sub><br>(°C) | Fragment size (bp) |
|----------------|-------------------------|----------------------|-------------------------|--------------------|
|                | Forward                 | Reverse              |                         |                    |
| <i>str</i> (A) | GAGAGCGTGACCGCCTCATT    | TCTGCTTCATCTGGCGCTGC | 57                      | 862                |
| <i>str</i> (B) | GCTCGGTCGTGAGAACAATC    | AGAATGCGTCCGCCATCTGT | 54                      | 859                |
| <i>aad</i> (K) | CCTCCTGACAACCTCCAAGA    | GCAAGACCTTCTGATACAGC | 52                      | 891                |
| <i>aad</i> (A) | GCGCCATCTGGAATCAACGT    | TGCCGGTTATTGCGCTGTAC | 54                      | 912                |
| <i>aac</i>     | ATCTGGCGGACGGCGAAGAA    | GCGAGGTATCGGAAGCCATT | 53                      | 856                |

**Table S5.** Primers used to amplify specific transposone genes in PCR experiments

| Gene                                            | Primer sequence (5'→3') |                     | T <sub>aa</sub><br>(°C) | Fragment size (bp) |
|-------------------------------------------------|-------------------------|---------------------|-------------------------|--------------------|
|                                                 | Forward                 | Reverse             |                         |                    |
| Tn916 integrase                                 | GTGGCTACAGACCGAGTA      | CTGCCATTGCAGAATCGA  | 60                      | 1018               |
| <i>TnB1230</i> orf1                             | GAGAAGTAACAGCACAGG      | TGCCTGAATAAAGTGCTGC | 60                      | 1079               |
| Tn1549 integrase                                | GACGGACGATATGCTTAC      | GCTAACCGGGTGCAGAAT  | 60                      | 1000               |
| Tn4451 recombinase JIR5708 ( <i>TnpX</i> )      | GCACTTTACGAGCGTTTG      | TACTGAACAGAACCCTCT  | 57                      | 1012               |
| Tn5397 resolvase <i>ssr-pET</i> ( <i>TndX</i> ) | TGATGGATTACGCGGAAC      | GGTCTCTAGTCTCTCCA   | 60                      | 997                |

**Table S6.** Number of microorganisms in the studied soils (cells per 1 g wet weight of soil)

| Group of bacteria         | Number of bacteria<br>(number of cells/g wet weight soil) |                       |                       |                       |                       |                       |
|---------------------------|-----------------------------------------------------------|-----------------------|-----------------------|-----------------------|-----------------------|-----------------------|
|                           | Compost                                                   | Forest soil           | Vegetable garden      | Apple orchard         | Mixed fruit orchard   | Farmland              |
| total (broth)             | 9.5 x 10 <sup>7</sup>                                     | 2.0 x 10 <sup>5</sup> | 6.7 x 10 <sup>7</sup> | 6.5 x 10 <sup>5</sup> | 2.0 x 10 <sup>6</sup> | 2.4 x 10 <sup>7</sup> |
| total (nutrient agar)     | 3.6 x 10 <sup>6</sup>                                     | 5.0 x 10 <sup>4</sup> | 4.5 x 10 <sup>6</sup> | 3.5 x 10 <sup>4</sup> | 6.4 x 10 <sup>5</sup> | 6.5 x 10 <sup>5</sup> |
| spore-forming             | 4.1 x 10 <sup>5</sup>                                     | 0.6 x 10 <sup>2</sup> | 1.5 x 10 <sup>4</sup> | 1.3 x 10 <sup>5</sup> | 2.6 x 10 <sup>4</sup> | 3.0 x 10 <sup>4</sup> |
| amylolytic                | 1.1 x 10 <sup>6</sup>                                     | 2.6 x 10 <sup>4</sup> | 3.7 x 10 <sup>7</sup> | 1.8 x 10 <sup>5</sup> | 4.6 x 10 <sup>5</sup> | 1.5 x 10 <sup>7</sup> |
| proteolytic               | 1.8 x 10 <sup>6</sup>                                     | 3.3 x 10 <sup>4</sup> | 5.6 x 10 <sup>6</sup> | 1.5 x 10 <sup>5</sup> | 6.4 x 10 <sup>4</sup> | 7.6 x 10 <sup>6</sup> |
| lipolytic                 | 1.0 x 10 <sup>4</sup>                                     | 2.0 x 10 <sup>2</sup> | 3.4 x 10 <sup>5</sup> | 5.4 x 10 <sup>5</sup> | 2.5 x 10 <sup>2</sup> | 2.8 x 10 <sup>5</sup> |
| hydrolyzing urea          | 3.0 x 10 <sup>5</sup>                                     | 2.0 x 10 <sup>2</sup> | 6.5 x 10 <sup>4</sup> | 6.4 x 10 <sup>3</sup> | 4.5 x 10 <sup>4</sup> | 6.4 x 10 <sup>3</sup> |
| ammonifying               | 6.5 x 10 <sup>5</sup>                                     | 2.0 x 10 <sup>3</sup> | 9.5 x 10 <sup>3</sup> | 1.0 x 10 <sup>3</sup> | 4.0 x 10 <sup>3</sup> | 1.0 x 10 <sup>3</sup> |
| nitrifying                | 3.5 x 10 <sup>4</sup>                                     | 2.0 x 10 <sup>3</sup> | 7.5 x 10 <sup>3</sup> | 1.0 x 10 <sup>4</sup> | 3.1 x 10 <sup>3</sup> | 1.0 x 10 <sup>4</sup> |
| denitrifying              | 1.5 x 10 <sup>3</sup>                                     | 2.5 x 10 <sup>2</sup> | 2.0 x 10 <sup>4</sup> | 1.5 x 10 <sup>3</sup> | 4.5 x 10 <sup>1</sup> | 1.5 x 10 <sup>3</sup> |
| sulfate reducing bacteria | 5.0 x 10 <sup>3</sup>                                     | 2.0 x 10 <sup>1</sup> | 9.5 x 10 <sup>3</sup> | 2.6 x 10 <sup>5</sup> | 2.5 x 10 <sup>3</sup> | 2.6 x 10 <sup>5</sup> |
| actinomycetes             | 9.6 x 10 <sup>5</sup>                                     | 8.1 x 10 <sup>3</sup> | 2.2 x 10 <sup>6</sup> | 2.3 x 10 <sup>6</sup> | 1.3 x 10 <sup>4</sup> | 2.6 x 10 <sup>5</sup> |

**Table S7.** Species of bacteria isolated from compost (1), forest (2), vegetable garden (3), apple orchard (4), mixed fruit orchard (5), farmland (6) soils under the pressure of the antibiotics tested

| Species                                 | Compost | Forest soil | Vegetable garden | Apple orchard | Mixed fruit orchard | Farmland |
|-----------------------------------------|---------|-------------|------------------|---------------|---------------------|----------|
| <i>Aeromonas salmonicida</i>            | +       |             |                  |               |                     | +        |
| <i>Arthrobacter sp.</i>                 |         |             | +                | +             | +                   |          |
| <i>Arthrobacter ilicis</i>              |         |             | +                |               |                     |          |
| <i>Bacillus sp.</i>                     |         |             | +                | +             | +                   |          |
| <i>Bacillus cereus</i>                  |         |             |                  | +             |                     |          |
| <i>Bacillus globisporus</i>             |         |             | +                |               |                     |          |
| <i>Bacillus thuringiensis</i>           |         |             | +                | +             |                     |          |
| <i>Bacillus weihenstephanensis</i>      |         |             |                  | +             |                     |          |
| <i>Brevibacterium frigoritolerans</i>   |         |             |                  | +             |                     |          |
| <i>Brevundimonas vesicularis</i>        |         |             |                  |               |                     | +        |
| <i>Burkholderia pseudomallei</i>        |         | +           |                  | +             |                     |          |
| <i>Burkholderia cepacia</i>             |         |             |                  |               |                     | +        |
| <i>Chryseobacterium jejuense</i>        |         |             | +                |               |                     |          |
| <i>Chryseobacterium meningosepticum</i> |         |             |                  |               |                     | +        |
| <i>Chryseobacterium ginsengisoli</i>    |         |             | +                |               |                     |          |
| <i>Corynebacterium glutamicum</i>       |         |             | +                |               |                     |          |
| <i>Flavobacterium sp.</i>               |         |             | +                |               |                     |          |
| <i>Flexibacter sancti</i>               |         |             |                  | +             |                     |          |
| <i>Leifsonia xyli</i>                   | +       |             |                  |               |                     |          |
| <i>Lysinibacillus sphaericus</i>        |         | +           |                  |               |                     | +        |
| <i>Mesorhizobium sp.</i>                |         |             |                  |               | +                   |          |
| <i>Microbacterium sp.</i>               |         |             |                  | +             |                     |          |
| <i>Microbacterium xylanilyticum</i>     |         |             |                  |               | +                   |          |
| <i>Micrococcus sp.</i>                  |         |             |                  |               | +                   |          |
| <i>Moraxella sp.</i>                    | +       | +           |                  |               |                     |          |
| <i>Paenibacillus sp.</i>                |         |             | +                | +             | +                   |          |
| <i>Paenibacillus amylolyticus</i>       |         |             |                  | +             |                     |          |
| <i>Paenibacillus xylanilyticum</i>      |         |             |                  | +             | +                   |          |



**Table S8.** The values are relative quantification (RQ) qRT-PCR using the 16S rRNA gene as the endogenous control and positive controls as the reference samples

| <b>Studied soils</b> | <i>aad(A)</i>   | <b>IS1133</b> | <i>str(A)</i>  | <i>str(B)</i>   | <i>tet(B)</i>   | <i>tet(M)</i>   | <i>tet(W)</i>   |
|----------------------|-----------------|---------------|----------------|-----------------|-----------------|-----------------|-----------------|
| <b>Apple</b>         | 27.073E-05<br>Y |               | Y              | 22.842E-09<br>Y | N               | 4.5293E-06<br>N | 3.1625E-05<br>N |
| <b>Veg</b>           | Y               |               | N              | 43.504E-09<br>N | N               | 1.9876E-06<br>Y | 18.076E-05<br>Y |
| <b>Arable</b>        | Y               |               | Y              | 2.2425E-09<br>N | Y               | 0.282E-06<br>Y  | 18.265E-05<br>Y |
| <b>Forest</b>        |                 |               | Y              | 2.9224E-09<br>Y | Y               | 2.9676E-06<br>Y | 12.839E-05<br>Y |
| <b>Compost</b>       |                 |               | 7.391E-10<br>Y | 4.6748E-09<br>N | Y               | 1.5024E-06<br>N | 6.0104E-05<br>Y |
| <b>Mixed</b>         | Y               |               | Y              | 8.9858E-09<br>Y | 3.1488E-09<br>Y | 2.602E-06<br>Y  | 7.2234E-05<br>N |

(N: Not detected by PCR screening of the culturable bacteria from the soil. Y: Detected by PCR screening of the culturable bacteria from the soil.)
